# Supplementary material
Source: Springer Nature journal article supplement (https://www.springermedizin.de/resource/supplementary/12958_2008_470_MOESM3_ESM.pdf/9567978)

# C siRNA

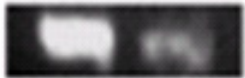

**VEGF** (200bp)

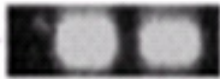

**GAPDH** (452bp)

Supplement: MOESM3 [file 9567978]
